# Supplementary material for: Tuning dielectric transitions by B′-site mixing in hybrid double perovskite crystals (CH3NH3)2[K1−xRbxCo(CN)6] (x = 0.23–0.62)
Source: Royal Society of Chemistry journal article supplement (doi:10.1039/c6qi00347h), 2016-01-01
Supplement: c6qi00347h1.pdf [file c6qi00347h1.pdf]

### Supporting Information

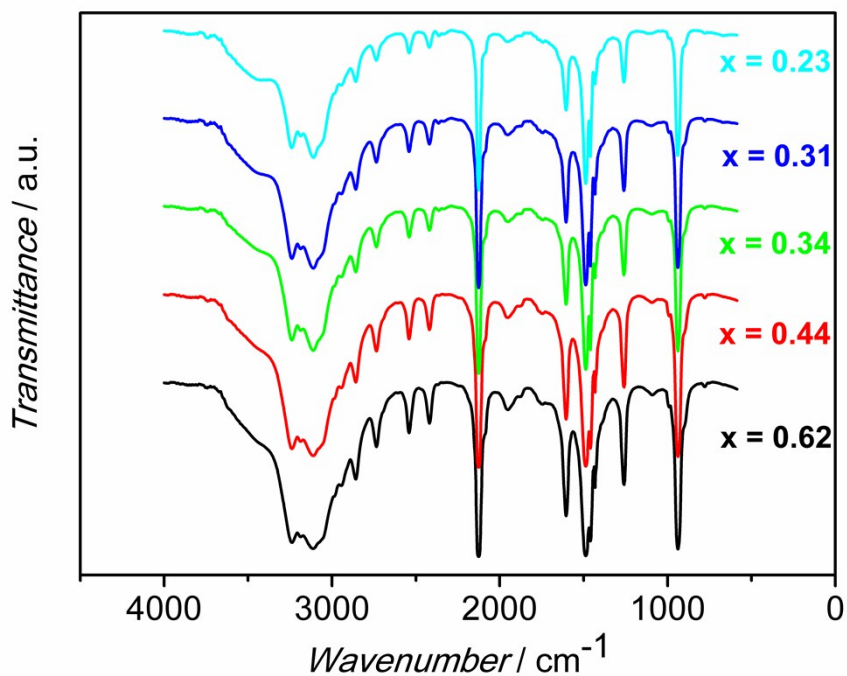

**Figure S1.** IR spectra of  $(MA)_2[K_{1-x}Rb_xCo(CN)_6]$  ( $x = 0.23-0.62$ ).

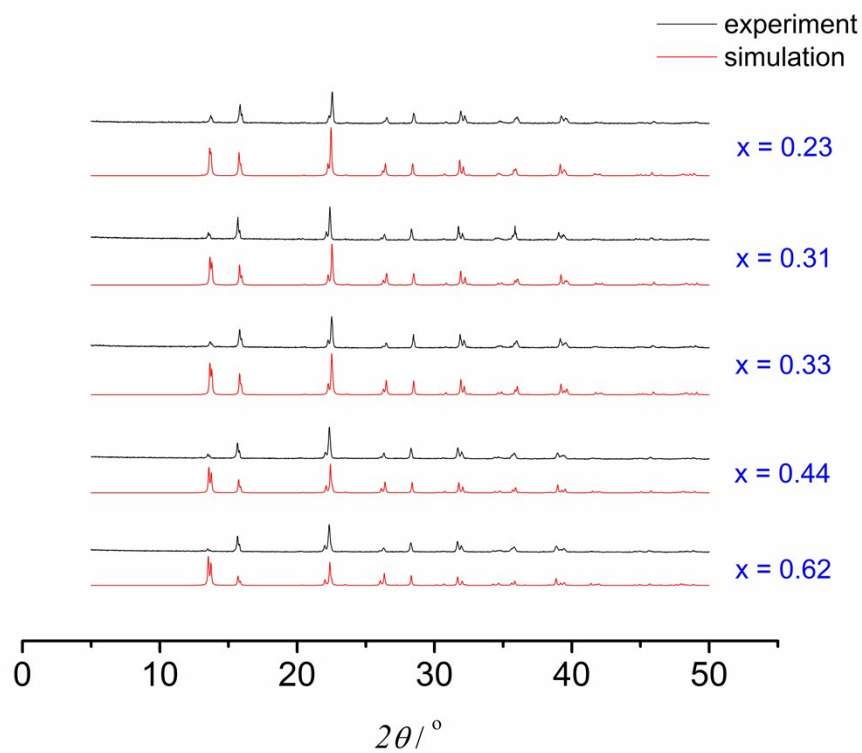

**Figure S2.** PXRD patterns of  $(MA)_2[K_{1-x}Rb_xCo(CN)_6]$  ( $x = 0.23-0.62$ ).

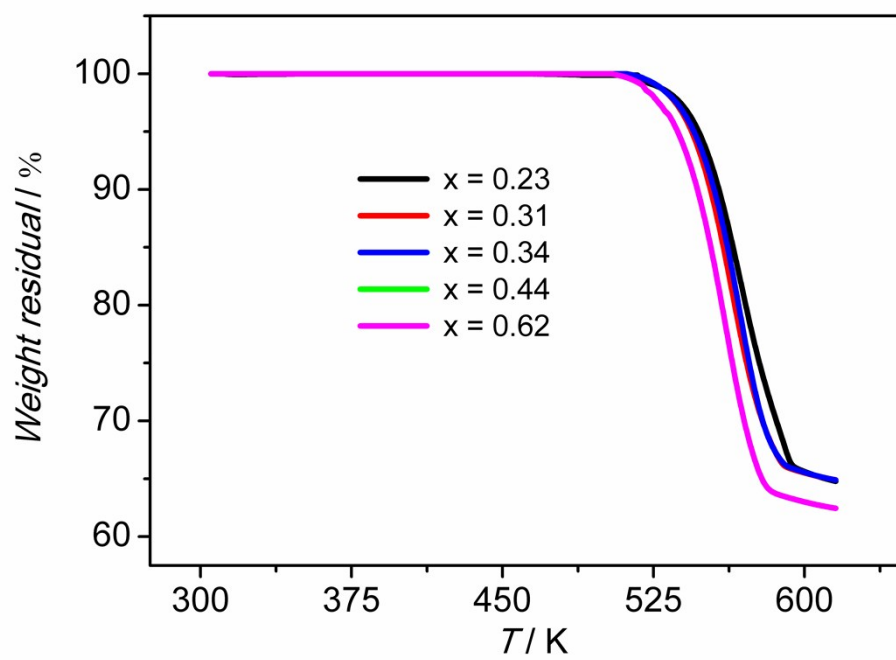

**Figure S3.** TGA curves of  $(MA)_2[K_{1-x}Rb_xCo(CN)_6]$  ( $x = 0.23-0.62$ ).

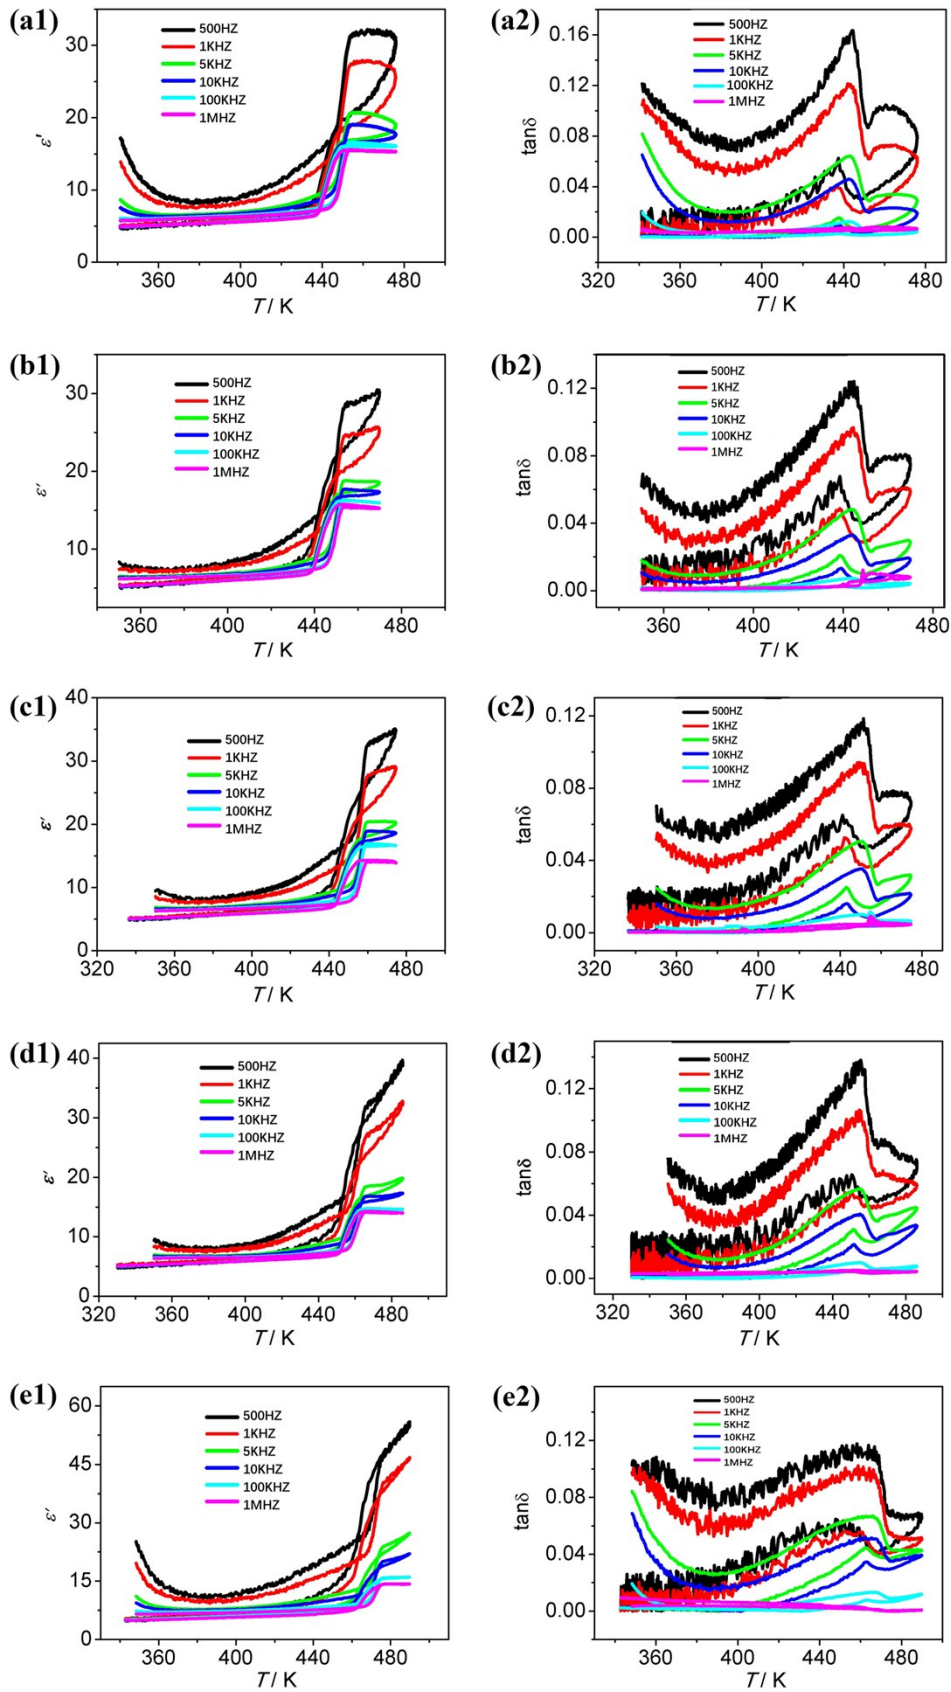

**Figure S4.** The  $\epsilon'$  vs  $T$  (left) and  $\tan\delta$  vs  $T$  (right) curves of  $(\text{MA})_2[\text{K}_{1-x}\text{Rb}_x\text{Co}(\text{CN})_6]$

at different frequencies measured in a heating/cooling mode: (a)  $x = 0.23$ ; (b)  $x = 0.31$ ;  
(c)  $x = 0.34$ ; (d)  $x = 0.44$ ; (e)  $x = 0.62$ .

**Table S1.** (a) Experimental data of the  $x$  and corresponding  $T_c$  and (b) calculated tolerance factor  $t$  for  $(MA)_2[K_{1-x}Rb_xCo(CN)_6]$ .

(a)

|           |     |      |      |      |      |      |     |
|-----------|-----|------|------|------|------|------|-----|
| $T_c / K$ | 418 | 433  | 438  | 440  | 446  | 458  | 484 |
| $x$       | 0   | 0.23 | 0.31 | 0.34 | 0.44 | 0.62 | 1   |

The relationship between the  $T_c$  and  $x$  is fitted by  $x = -13.2 + 0.645T_c^{1/2}$  ( $R = 0.987$ )

by using  $r_K = 152$  pm,  $r_{Rb} = 166$  pm and  $r_{B'} = (1-x)r_K + xr_{Rb}$ .

(b)

|     |       |       |       |       |       |       |       |
|-----|-------|-------|-------|-------|-------|-------|-------|
| $x$ | 0     | 0.23  | 0.31  | 0.34  | 0.44  | 0.62  | 1     |
| $t$ | 0.833 | 0.828 | 0.827 | 0.826 | 0.825 | 0.821 | 0.814 |

The tolerance factor  $t$  is calculated by  $t = 513/(14x+616)$ .
